# Supplementary material for: Increase of Salt Tolerance in Carbon-Starved Cells of Rhodopseudomonas palustris Depending on Photosynthesis or Respiration
Source: MDPI journal article supplement (doi:10.3390/microorganisms6010004), 2018-01-06

## Supplemental Material

**Figure S1.** Phototrophic growth of *R. palustris* CGA009 in the carbon-limited medium

We used the cells approximately 2 hours before the growth-termination as “growing cells” (indicated by upward arrow). The cells, indicated by downward arrow, were defined as “starvation-initiated cells” after no increase of the OD was confirmed.

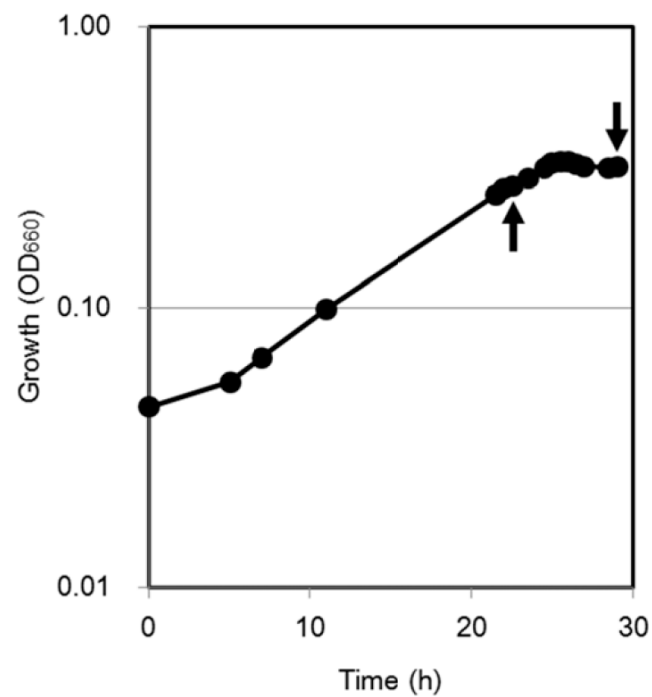

Supplement: s1 [file s1]
